# Supplementary material for: Satisfaction with caregivers during labour among low risk women in the Netherlands: the association with planned place of birth and transfer of care during labour
Source: Springer Nature journal article supplement (doi:10.1186/s12884-017-1410-9), 2017-07-13
Supplement: MOESM1 [file 13304184]

*Deze vragenlijst start met een aantal vragen over uzelf en uw contact(en) met de verloskundige praktijk.*

1. Bent u op dit moment **zwanger**?  
 nee  
 ja, momenteel ..... weken (afronden op hele weken) → *u hoeft deze vragenlijst niet verder in te vullen en kunt hem nu opsturen.*
2. Bent u onlangs **bevallen** (een miskraam valt hier in dit geval niet onder)?  
 ja → *ga door naar vraag 6.*  
 nee
3. Wat was de **reden** voor uw contact met de verloskundige praktijk:  
 kindwensgesprek → *u hoeft deze vragenlijst niet verder in te vullen en kunt hem nu opsturen.*  
 ik was zwanger maar heb een miskraam gehad → *ga door naar de volgende vraag*  
 ik was zwanger maar heb de zwangerschap af laten breken → *u hoeft deze vragenlijst niet verder in te vullen en kunt hem nu opsturen.*  
 anders, namelijk ..... → *u hoeft deze vragenlijst niet verder in te vullen en kunt hem nu opsturen.*

*Een miskraam is een zeer trieste gebeurtenis. We begrijpen dan ook dat het lastig kan zijn om nog enkele vragen te beantwoorden. Toch willen we uw medewerking vragen om uw mening te geven over de aan u gegeven zorg, want ook in geval van een miskraam verdient u goede zorg.*

4. **Hoe vaak** heeft u contact gehad met de verloskundige?  
 1 maal  
 2-3 maal  
 Meer dan 3 maal
5. Door wie werd u **begeleid** in de periode rondom uw miskraam? (*meerdere antwoorden mogelijk*)  
 Huisarts  
 Verloskundige  
 Gynaecoloog  
 Anders, namelijk .....  
 Niemand  
→ *U hoeft deze vragenlijst niet verder in te vullen en kunt hem nu opsturen.*

*Hieronder volgt een aantal vragen over de bevalling.*

6. Werd de bevalling **begeleid** door één of meer van de volgende personen? (*meerdere antwoorden mogelijk*)  
 een verloskundige of waarneemster uit de eigen praktijk  
 de huisarts  
 de gynaecoloog of arts-assistent in het ziekenhuis  
 verloskundige van het ziekenhuis of geboortecentrum  
 een verloskundige in opleiding  
 anders, namelijk .....  
 niemand

7. Met hoeveel **weken** zwangerschap bent u bevallen?  
 vóór 37 weken zwangerschap  
 met 37 weken  
 met 38 weken  
 met 39 weken  
 met 40 weken  
 met 41 weken  
 met 42 weken  
 na meer dan 42 weken zwangerschap
8. Op welke **datum** is uw kind **geboren**:  
 Geboortedatum kind: .....
9. Op welk **tijdstip** van de dag is uw kind geboren:  
*24-uurs notatie*  
 geboortetijdstip kind: .....uur.....minuut
10. Was dit 's ochtends, 's middags, 's avonds of 's nachts?  
 's Ochtends  
 's middags  
 's avonds  
 's nachts
11. **Waar** vond de bevalling plaats?  
 thuis  
 thuis, maar ik moest zelf na de geboorte naar het ziekenhuis  
 thuis, maar de baby moest na de geboorte naar het ziekenhuis  
 thuis begonnen, maar uiteindelijke geboorte in het ziekenhuis  
 op eigen verzoek in het ziekenhuis of geboortecentrum  
 om medische redenen in het ziekenhuis  
 elders, namelijk .....
12. Waren er, naast zorgverleners, nog **anderen aanwezig** bij de bevalling?  
*(meerdere antwoorden mogelijk)*  
 geen anderen aanwezig  
 mijn partner  
 (schoon)moeder/-ouders  
 kind(eren)  
 vriend(in)  
 anderen, namelijk .....
13. Hoe is de bevalling **verlopen**?  
*(meerdere antwoorden mogelijk)*  
 geheel spontaan en zonder ingrepen  
 ik ben ingeknipt  
 de placenta kwam niet vanzelf, moest verwijderd worden  
 de vliezen zijn door een zorgverlener gebroken om de bevalling op gang te brengen  
 de bevalling is in het ziekenhuis ingeleid  
 de weeën zijn kunstmatig (door middel van een infuus) versterkt  
 ik ben na de bevalling gehecht  
 de baby is met een kunstverlossing (met tang of vacuümpomp) geboren  
 het is een keizersnede geworden  
 het was een geplande keizersnede, voordat de bevalling op gang kwam → *ga door naar vraag 21.*
14. Heeft u behoefte gehad aan een vorm van **pijnbestrijding**? *(dit kan zijn met of zonder medicijnen)*  
 ja  
 nee

15. Heeft u gebruik gemaakt van een behandeling van de pijn tijdens de bevalling **zonder medicijnen**?

0 nee → *ga door naar vraag 17.*

0 ja → Wat voor soort behandeling heeft u gehad? (*meerdere antwoorden mogelijk*)

- 0 rugmassage
- 0 warm bad of douche
- 0 drukpuntmassage
- 0 geboorte-Tens (apparaatje waarmee u zich kleine stroomstootjes toedient via plakkertjes op uw rug)
- 0 acupunctuur
- 0 anders, namelijk .....

16. Was dat de behandeling van de pijn die u graag wilde?

- 0 ja
- 0 nee

17. Heeft u gebruik gemaakt van een vorm van het tegengaan van de pijn **met medicijnen** tijdens de bevalling?

0 nee → *ga door naar vraag 19.*

0 ja → Wat voor soort behandeling heeft u gehad? (*meerdere antwoorden mogelijk*)

- 0 injectie(s) (spuiten) met pijnstilling
- 0 infuus met een pompje waarbij u zelf de dosering kunt bepalen
- 0 ruggenprik (eventueel met doseerpompje die u zelf kon regelen)
- 0 algehele verdooving
- 0 anders, namelijk .....

18. Was dat de behandeling van de pijn die u graag wilde?

- 0 ja
- 0 nee

19. Hoeveel pijn heeft u ervaren tijdens de **ontsluitingsweeën**?

*Geef dit aan door een getal te omcirkelen op onderstaande schaal, waarbij 1 staat voor helemaal geen pijn en 10 voor de ergst mogelijke pijn.*

Helemaal geen pijn De ergst mogelijke pijn  
 1 1½ 2 2½ 3 3½ 4 4½ 5 5½ 6 6½ 7 7½ 8 8½ 9 9½ 10  
 Niet van toepassing (geen weeën gehad)

20. Hoeveel pijn heeft u ervaren tijdens de **persweeën**?

*Geef dit aan door een getal te omcirkelen op onderstaande schaal, waarbij 1 staat voor helemaal geen pijn en 10 voor de ergst mogelijke pijn.*

Helemaal geen pijn De ergst mogelijke pijn  
 1 1½ 2 2½ 3 3½ 4 4½ 5 5½ 6 6½ 7 7½ 8 8½ 9 9½ 10  
 Niet van toepassing (geen weeën gehad)

21. Was dit uw eerste bevalling?

- 0 Ja → *ga door naar vraag 24.*
- 0 Nee

**22. Hoeveel pijn heeft u ervaren tijdens de **ontsluitingsweeën** van uw vorige bevalling?**  
*Geef dit aan door een getal te omcirkelen op onderstaande schaal, waarbij 1 staat voor helemaal geen pijn en 10 voor de ergst mogelijke pijn.*

Helemaal geen pijn De ergst mogelijke pijn  
 1 1½ 2 2½ 3 3½ 4 4½ 5 5½ 6 6½ 7 7½ 8 8½ 9 9½ 10  
 Niet van toepassing (geen ontsluitingsweeën gehad)

**23. Hoeveel pijn heeft u ervaren tijdens de **persweeën** van uw vorige bevalling?**  
*Geef dit aan door een getal te omcirkelen op onderstaande schaal, waarbij 1 staat voor helemaal geen pijn en 10 voor de ergst mogelijke pijn.*

Helemaal geen pijn De ergst mogelijke pijn  
 1 1½ 2 2½ 3 3½ 4 4½ 5 5½ 6 6½ 7 7½ 8 8½ 9 9½ 10  
 Niet van toepassing (geen persweeën gehad)

**24. Welke vormen** van het tegengaan van de pijn tijdens de bevalling heeft uw verloskundige met u besproken, voordat u ging bevallen? *(meerdere antwoorden mogelijk)*

- rugmassage
- warm bad of douche
- drukpuntmassage
- geboorte-Tens (apparaatje waarmee u zich kleine stroomstootjes toedient via plakkertjes op uw rug)
- acupunctuur
- injectie(s) (spuiten) met pijnstilling
- infuus met een pompje waarbij u zelf de dosering kunt bepalen
- ruggenprik
- anders, namelijk .....
- geen

**25. Had u voorafgaand aan de bevalling een voorkeur voor een bepaalde manier van het tegengaan van de pijn tijdens de bevalling?**

- nee → *ga door naar vraag 27*
- ja

**26. Is uw voorkeur voor het tegengaan van de pijn tijdens de bevalling **vastgelegd** in uw dossier of geboortepan?**

- ja
- nee
- weet niet

*Indien u een geplande keizersnede heeft gehad, dan kunt u vraag 27 t/m 29 overslaan en doorgaan met vraag 30.*

**27. Kon u zich tijdens de weeën nog steeds bewegen zoals u graag wilde (lopen, zitten, liggen, een bad of douche nemen)?**

*Indien u meerdere bevallingen heeft gehad, betreft dit de laatste bevalling*

- ja
- nee → **Waarom niet? (meerdere antwoorden mogelijk)**
  - vanwege de medische apparatuur moest ik op bed blijven
  - vanwege de pijnmedicatie kon ik mijn benen niet meer goed bewegen
  - vanwege de pijnmedicatie was ik niet meer helder
  - er werd mij gezegd dat het voor mij beter was om op bed te blijven
  - de zorgverlener had liever dat ik op bed bleef zodat zij/hij er beter bij kon
  - de weeën waren te pijnlijk en/of te snel achter elkaar
  - anders, namelijk .....

Indien u geen ontsluitingsweeën heeft gehad, dan kunt u vraag 28 overslaan.

28. Wilt u voor het volgende blok met uitspraken aangeven aan hoe zich voelde tijdens de ontsluitingsweeën voorafgaande aan het persen?

|                                                         | De hele tijd of bijna de hele tijd | Ongeveer driekwart van de tijd | Iets meer dan de helft van de tijd | Ongeveer de helft van de tijd | Iets minder dan de helft van de tijd | Ongeveer een kwart van de tijd | Niet of bijna niet |
|---------------------------------------------------------|------------------------------------|--------------------------------|------------------------------------|-------------------------------|--------------------------------------|--------------------------------|--------------------|
| Ik voelde me gespannen                                  | 0                                  | 0                              | 0                                  | 0                             | 0                                    | 0                              | 0                  |
| Ik voelde me belangrijk                                 | 0                                  | 0                              | 0                                  | 0                             | 0                                    | 0                              | 0                  |
| Ik had zelfvertrouwen                                   | 0                                  | 0                              | 0                                  | 0                             | 0                                    | 0                              | 0                  |
| Ik had het gevoel mezelf in de hand te hebben           | 0                                  | 0                              | 0                                  | 0                             | 0                                    | 0                              | 0                  |
| Ik was bang                                             | 0                                  | 0                              | 0                                  | 0                             | 0                                    | 0                              | 0                  |
| Ik voelde me ontspannen                                 | 0                                  | 0                              | 0                                  | 0                             | 0                                    | 0                              | 0                  |
| Ik had het gevoel dat ik het goed deed                  | 0                                  | 0                              | 0                                  | 0                             | 0                                    | 0                              | 0                  |
| Ik voelde me hulpeloos                                  | 0                                  | 0                              | 0                                  | 0                             | 0                                    | 0                              | 0                  |
| Ik voelde me machteloos                                 | 0                                  | 0                              | 0                                  | 0                             | 0                                    | 0                              | 0                  |
| Ik had het gevoel bij de mensen te zijn die om me geven | 0                                  | 0                              | 0                                  | 0                             | 0                                    | 0                              | 0                  |
| Ik had het gevoel te falen                              | 0                                  | 0                              | 0                                  | 0                             | 0                                    | 0                              | 0                  |

Indien u geen persweeën/uitdrijvingsweeën heeft gehad, dan kunt u vraag 29 overslaan.

29. Wilt u voor het volgende blok met uitspraken terugdenken aan hoe u zich voelde tijdens het persen ofwel de uitdrijvingsweeën?

|                                                         | De hele tijd of bijna de hele tijd | Ongeveer driekwart van de tijd | Iets meer dan de helft van de tijd | Ongeveer de helft van de tijd | Iets minder dan de helft van de tijd | Ongeveer een kwart van de tijd | Niet of bijna niet |
|---------------------------------------------------------|------------------------------------|--------------------------------|------------------------------------|-------------------------------|--------------------------------------|--------------------------------|--------------------|
| Ik voelde me gespannen                                  | 0                                  | 0                              | 0                                  | 0                             | 0                                    | 0                              | 0                  |
| Ik voelde me belangrijk                                 | 0                                  | 0                              | 0                                  | 0                             | 0                                    | 0                              | 0                  |
| Ik had zelfvertrouwen                                   | 0                                  | 0                              | 0                                  | 0                             | 0                                    | 0                              | 0                  |
| Ik had het gevoel mezelf in de hand te hebben           | 0                                  | 0                              | 0                                  | 0                             | 0                                    | 0                              | 0                  |
| Ik was bang                                             | 0                                  | 0                              | 0                                  | 0                             | 0                                    | 0                              | 0                  |
| Ik voelde me ontspannen                                 | 0                                  | 0                              | 0                                  | 0                             | 0                                    | 0                              | 0                  |
| Ik had het gevoel dat ik het goed deed                  | 0                                  | 0                              | 0                                  | 0                             | 0                                    | 0                              | 0                  |
| Ik voelde me hulpeloos                                  | 0                                  | 0                              | 0                                  | 0                             | 0                                    | 0                              | 0                  |
| Ik voelde me machteloos                                 | 0                                  | 0                              | 0                                  | 0                             | 0                                    | 0                              | 0                  |
| Ik had het gevoel bij de mensen te zijn die om me geven | 0                                  | 0                              | 0                                  | 0                             | 0                                    | 0                              | 0                  |
| Ik had het gevoel te falen                              | 0                                  | 0                              | 0                                  | 0                             | 0                                    | 0                              | 0                  |

30. In welke **houding** heeft u uw kind gebaard?
- zittend in bed of op baarkruk
  - zittend in bad
  - hurkend, of op handen en voeten
  - liggend op een bed of operatietafel
  - anders, namelijk .....
  - weet ik niet
31. Heeft u binnen een uur na de geboorte **huidcontact** met uw baby gehad?
- ja
  - weet ik niet
  - nee → **Waarom niet?**
    - vanwege complicaties bij de baby
    - vanwege complicaties bij mij zelf (bijvoorbeeld keizersnede)
    - anders, namelijk .....
32. Heeft u binnen een uur na de geboorte de gelegenheid gekregen om met **borstvoeding** te beginnen?
- ja
  - nee → **Waarom niet?**
    - vanwege complicaties bij de baby
    - vanwege complicaties bij mij zelf (bijvoorbeeld keizersnede)
    - ik had aangegeven dat ik geen borstvoeding wilde geven
    - anders, namelijk .....
    - weet niet

---

## ZORGGEBRUIK

*We willen u graag twee vragen stellen over een deel van de verloskundige zorg tijdens uw zwangerschap.*

33. Heeft u tijdens de zwangerschap één of meer van de onderstaande **onderzoeken** naar de gezondheid van uw kind laten uitvoeren?  
*(meerdere antwoorden mogelijk)*
- nee, ik heb geen onderzoek laten uitvoeren
  - termijnecho (echo bij ongeveer 12 weken)
  - combinatie test (screening op het Downsyndroom)
  - 20 weken echo
  - vruchtwaterpunctie
  - vlokentest
  - anders, namelijk .....
34. Hoe **kijkt u achteraf terug** op uw keuze om dergelijk onderzoek wel of niet uit te laten voeren?
- ik zou achteraf gezien dezelfde keuze weer maken
  - ik zou achteraf gezien een andere keuze maken, namelijk, .....
  - weet ik niet

*De kraamperiode is meestal een leuke tijd vol nieuwe dingen, maar kan ook vermoeiend zijn waardoor jonge moeders wel wat hulp kunnen gebruiken. We willen u nu enkele vragen stellen over uw gebruik van en ervaringen met de kraamzorg.*

*Indien u een geplande keizersnede heeft gehad, dan kunt u vraag 35 t/m 38 overslaan en doorgaan met vraag 39.*

35. Was er een **kraamverzorgende** aanwezig bij de bevalling?
- nee → *ga door naar vraag 39.*
  - ja

36. Op welk moment was de kraamverzorgende **gearriveerd**?  
 ruim vóór de geboorte van de baby  
 kort voor of tijdens de geboorte van de baby  
 na de geboorte van de baby
37. **Hoe lang** was de kraamverzorgende aanwezig tijdens de bevalling?  
 minder dan 1 uur  
 meer dan 1 uur maar minder dan 2 uur  
 meer dan 2 uur
38. Is de kraamverzorgende **na de bevalling gebleven** om die dag kraamzorg te verlenen?  
 ja, ze is gebleven  
 nee, ze is na de bevalling weggegaan  
 weet ik niet
39. Heeft u professionele kraamzorg **thuis** gehad?  
 nee → *ga door naar vraag 48.*  
 ja
40. **Waarvoor** heeft u die kraamzorg thuis gehad?  
*(meerder antwoorden mogelijk)*  
 hulp tijdens de bevalling (spullen klaarzetten, opruimen, wassen, enz.)  
 emotionele steun tijdens de bevalling  
 hulp bij verzorging van mijn baby (wassen, baden, aankleden, voeden, enz.)  
 hulp bij verzorging van mezelf (wondverzorging, temperatuur, enz.)  
 voorlichting, advies en instructie over borstvoeding en flesvoeding  
 voorlichting, advies en instructie over babyverzorging, slaap/waakritme baby, slaaphouding enz.  
 voorlichting, advies en instructie over uw eigen verzorging, rust, hygiëne, enz.  
 hulp bij huishoudelijk werk (koken, boodschappen, de was, schoonmaken enz.)  
 hulp bij verzorging gezin (zorg voor overige kinderen, kraamvisite, enz.)  
 anders, namelijk .....
41. Op **hoeveel dagen** na de bevalling heeft u thuis kraamzorg gehad?  
 ..... dagen
42. **Hoe lang** was de kraamverzorgende dagelijks (ongeveer) aanwezig?  
 minder dan 3 uur  
 meer dan 3 uur maar minder dan 5 uur  
 meer dan 5 uur
43. Was de kraamverzorgende dagelijks (ongeveer) **even lang** aanwezig?  
 ja  
 nee, de eerste dagen was ze langer aanwezig dan de laatste dagen  
 nee, de eerste dagen was ze korter aanwezig dan de laatste dagen  
 weet ik niet
44. Heeft u het aantal uren kraamzorg gekregen dat voor de bevalling met u was **afgesproken**?  
 ja → *ga door naar vraag 46.*  
 nee, ik heb minder uren kraamzorg gekregen dan was afgesproken → *ga door naar de volgende vraag*  
 nee, ik heb meer uren kraamzorg gekregen dan was afgesproken → *ga door naar de volgende vraag*  
 weet ik niet → *ga door naar vraag 46.*

45. Wat is de **reden** dat u niet het afgesproken aantal uren kraamzorg heeft gekregen?  
(meerdere antwoorden mogelijk)
- verblijf in het ziekenhuis na de bevalling
  - meerling
  - conditie baby
  - conditie moeder
  - problemen met voeding
  - kosten (eigen bijdrage) te hoog
  - eigen verzoek
  - te weinig personeel bij de kraamorganisatie
  - anders, namelijk.....
46. Wat vindt u van het **aantal uren** kraamzorg dat u heeft gehad?
- te weinig
  - net voldoende
  - ruim voldoende
  - te veel
47. Heeft u steeds **dezelfde kraamverzorgende** in huis gehad?
- ja
  - ja, alleen de kraamverzorgende die bij de bevalling was, was een andere dan die daarna kwam
  - nee, na een paar dagen kwam een andere kraamverzorgende
  - nee, er zijn drie of meer verschillende kraamverzorgenden bij mij thuis geweest
48. Heeft uw baby in de eerste week een **hielprik** gehad?
- nee
  - weet ik niet
  - ja → Door wie is de hielprik uitgevoerd?
    - verloskundige
    - huisarts
    - kraamverzorgende
    - wijkverpleegkundige
    - verpleegkundige/laborante in het ziekenhuis
    - weet ik niet
49. Heeft uw baby een **gehoortest** gehad?
- nee → *ga door naar vraag 51.*
  - ik weet niet meer of mijn baby een gehoortest heeft gehad → *ga door naar vraag 51*
  - ja, in de eerste week na de geboorte
  - ja, na de eerste week
  - ja, maar ik weet niet meer wanneer
50. Door wie is de gehoortest uitgevoerd?
- verloskundige
  - huisarts
  - kraamverzorgende
  - wijkverpleegkundige
  - verpleegkundige/laborante in het ziekenhuis
  - weet ik niet
51. Heeft u een **nacontrole** bij uw verloskundige of gynaecoloog gehad?
- Ja, bij de verloskundige
  - Ja, bij de gynaecoloog
  - Ik heb een afspraak gemaakt, maar ben nog niet geweest
  - Nee → Waarom niet?
    - Geen behoefte aan / ik vind het niet nodig
    - Alles gaat goed
    - Ik ben te kort geleden bevallen
    - Anders, namelijk .....



52. Hoeveel **weken oud** is uw kindje nu? (op het moment van invullen van de vragenlijst).

- jonger dan 2 weken
- vanaf 2 weken tot 4 weken
- vanaf 4 weken tot en met 6 weken
- ouder dan 6 weken

53. Geeft u op dit moment **borstvoeding**?

- Ja
- Gedeeltelijk, in combinatie met flesvoeding
- Nee, alleen flesvoeding

### ERVARING MET DE ZORGVERLENING

*Tijdens en na de bevalling heeft u waarschijnlijk contact gehad met een verloskundige en kraamverzorgende. Om de verloskundige zorg en kraamzorg te kunnen verbeteren, is het belangrijk om de mening van vrouwen te weten over deze zorg. Hieronder volgt een aantal vragen over uw ervaringen met uw verloskundige zorgverlener (verloskundige uit uw eigen praktijk, huisarts, verloskundige uit het ziekenhuis of gynaecoloog) en kraamzorg tijdens de bevalling en de kraamperiode.*

54. Wilt u voor de volgende vragen aangeven hoe vaak dit **tijdens de bevalling** het geval was?

|                                                                                          | Nooit | Soms | Meestal | Altijd |
|------------------------------------------------------------------------------------------|-------|------|---------|--------|
| Had u het gevoel bij de verloskundige zorgverlener in vertrouwde handen te zijn geweest? | 0     | 0    | 0       | 0      |
| Legde de verloskundige zorgverlener dingen op een begrijpelijke manier uit?              | 0     | 0    | 0       | 0      |
| Behandelde de verloskundige zorgverlener u beleefd?                                      | 0     | 0    | 0       | 0      |
| Luisterde de verloskundige zorgverlener aandachtig naar u?                               | 0     | 0    | 0       | 0      |
| Nam de verloskundige zorgverlener u serieus?                                             | 0     | 0    | 0       | 0      |
| Besteedde de verloskundige zorgverlener voldoende tijd aan u?                            | 0     | 0    | 0       | 0      |
| Kon u de verloskundige zorgverlener vragen stellen als u iets wilde weten?               | 0     | 0    | 0       | 0      |

55.

|                                    | Nederland | Indonesië / voormalig Nederlands-Indië | Suriname | Marokko | Turkije | Nederlandse Antillen of Aruba | Anders, namelijk |
|------------------------------------|-----------|----------------------------------------|----------|---------|---------|-------------------------------|------------------|
| In welk land bent u geboren?       | 0         | 0                                      | 0        | 0       | 0       | 0                             | .....            |
| In welk land is uw moeder geboren? | 0         | 0                                      | 0        | 0       | 0       | 0                             | .....            |
| In welk land is uw vader geboren?  | 0         | 0                                      | 0        | 0       | 0       | 0                             | .....            |

56. Welke taal spreekt u meestal thuis?

- 0 Nederlands
- 0 Fries
- 0 Nederlands dialect
- 0 Engels
- 0 Surinaams
- 0 Marokkaans
- 0 Turks
- 0 Arabisch
- 0 Berbers
- 0 Anders, namelijk:.....

Indien u of een van uw ouders in het buitenland is geboren, beantwoord dan graag de volgende vraag (57).

57.

|                                                                                                                                 | Nooit | Soms | Meestal | Altijd | Niet van toepassing |
|---------------------------------------------------------------------------------------------------------------------------------|-------|------|---------|--------|---------------------|
| Had de verloskundige zorgverlener begrip voor thuisgewoontes rond de geboorte, die anders zijn dan bij autochtone Nederlanders? | 0     | 0    | 0       | 0      | 0                   |

Iedereen graag de volgende vraag beantwoorden (58).

58. Wat zijn uw ervaringen met uw verloskundige zorgverlener?

| De verloskundige zorgverlener die mij begeleidt ...                                              | Nooit | Soms | Meestal | Altijd |
|--------------------------------------------------------------------------------------------------|-------|------|---------|--------|
| ... behandelt iedereen gelijkwaardig ongeacht geloof, afkomst of huidskleur (discrimineert niet) | 0     | 0    | 0       | 0      |
| ... heeft belangstelling voor mijn cultuur en achtergrond                                        | 0     | 0    | 0       | 0      |
| ... heeft kennis van gebruiken rond bevalling en kraambed in andere culturen                     | 0     | 0    | 0       | 0      |

Indien u thuis meestal een andere taal spreekt dan Nederlands, Fries, of Nederlands dialect, beantwoord dan graag vraag 59.

59. Wat zijn uw ervaringen met uw verloskundige zorgverlener?

| De verloskundige zorgverlener die mij begeleidt ...                                           | Nooit | Soms | Meestal | Altijd |
|-----------------------------------------------------------------------------------------------|-------|------|---------|--------|
| ... heeft er begrip voor als ik, door taalproblemen, soms moeilijk mijn verhaal kan vertellen | 0     | 0    | 0       | 0      |
| ... heeft voorlichtingsfolders in mijn eigen taal                                             | 0     | 0    | 0       | 0      |
| ... schakelt, als ik dat op prijs stel, een tolk in                                           | 0     | 0    | 0       | 0      |

60. Wilt u hieronder het cijfer **omcirkelen** dat het best uw **totaaloordeel** weergeeft over de zorg door uw verloskundige zorgverlener **tijdens de bevalling?**

1 betekent: de slechtst mogelijke zorg en 10 betekent: de best mogelijke zorg

De slechtst mogelijke zorg      De best mogelijke zorg

1      2      3      4      5      6      7      8      9      10





69. Heeft u hiervoor een **hulpverlener** geraadpleegd?

0 nee

0 ja → Welke hulpverleners heeft u hiervoor geraadpleegd? (meerdere antwoorden mogelijk)

0 verloskundige

0 huisarts

0 fysiotherapeut

0 anders, namelijk .....

## CONTACT MET ZORGVERLENERS

70. Kunt u aangeven of u, sinds het begin van uw zwangerschap, naast de verloskundige, ook **contact** gehad heeft met de volgende **zorgverleners**? Indien nee, geef dan bij het aantal contacten 0 aan.

| Zorgverlener                                            | Aantal contacten/bezoeken |     |     |     |       |       |     |
|---------------------------------------------------------|---------------------------|-----|-----|-----|-------|-------|-----|
|                                                         | 0                         | 1-3 | 4-6 | 7-9 | 10-12 | 13-15 | >15 |
| Gynaecoloog                                             | 0                         | 0   | 0   | 0   | 0     | 0     | 0   |
| Andere specialist <sup>1</sup>                          | 0                         | 0   | 0   | 0   | 0     | 0     | 0   |
| Huisarts                                                | 0                         | 0   | 0   | 0   | 0     | 0     | 0   |
| Tandarts                                                | 0                         | 0   | 0   | 0   | 0     | 0     | 0   |
| Fysiotherapeut                                          | 0                         | 0   | 0   | 0   | 0     | 0     | 0   |
| Mensendieck therapeut                                   | 0                         | 0   | 0   | 0   | 0     | 0     | 0   |
| Gesartherapeut                                          | 0                         | 0   | 0   | 0   | 0     | 0     | 0   |
| Mondhygiëniste                                          | 0                         | 0   | 0   | 0   | 0     | 0     | 0   |
| Logopedist                                              | 0                         | 0   | 0   | 0   | 0     | 0     | 0   |
| Ergotherapeut                                           | 0                         | 0   | 0   | 0   | 0     | 0     | 0   |
| Podotherapeut                                           | 0                         | 0   | 0   | 0   | 0     | 0     | 0   |
| Orthoptist                                              | 0                         | 0   | 0   | 0   | 0     | 0     | 0   |
| Diëtist                                                 | 0                         | 0   | 0   | 0   | 0     | 0     | 0   |
| Lactatiekundige                                         | 0                         | 0   | 0   | 0   | 0     | 0     | 0   |
| Wijkverpleegkundige                                     | 0                         | 0   | 0   | 0   | 0     | 0     | 0   |
| Kraamzorg                                               | 0                         | 0   | 0   | 0   | 0     | 0     | 0   |
| Gezinsverzorgende (voor hulp bij huishoudelijk werk)    | 0                         | 0   | 0   | 0   | 0     | 0     | 0   |
| Gezinsverzorgende (voor hulp bij dagelijkse verzorging) | 0                         | 0   | 0   | 0   | 0     | 0     | 0   |
| Andere zorgverlener <sup>2</sup>                        | 0                         | 0   | 0   | 0   | 0     | 0     | 0   |

<sup>1</sup> Indien u contact heeft gehad met een andere specialist, beantwoord dan graag de volgende vraag (71).

71. Wat voor **specialist**(en) was(waren) dit? .....

<sup>2</sup> Indien u contact heeft gehad met een andere zorgverlener, beantwoord dan graag de volgende vraag (72).

72. Wat voor **zorgverlener**(s) was(waren) dit? .....

73. Heeft u sinds uw bevalling in een **ziekenhuis** gelegen?

0 nee

0 ja → Wat was de reden van opname in het ziekenhuis?

.....

74. Heeft u sinds het begin van uw zwangerschap **contact** gehad met onderstaande **psychosociale** hulpverleners en/of instellingen? Indien nee, geef dan bij het aantal contacten 0 aan.

| Psychosociale hulpverlener / instelling          | Aantal contacten |     |     |     |       |       |     |
|--------------------------------------------------|------------------|-----|-----|-----|-------|-------|-----|
|                                                  | 0                | 1-3 | 4-6 | 7-9 | 10-12 | 13-15 | >15 |
| RIAGG                                            | 0                | 0   | 0   | 0   | 0     | 0     | 0   |
| Vrij gevestigd psycholoog                        | 0                | 0   | 0   | 0   | 0     | 0     | 0   |
| Vrij gevestigd psychiater                        | 0                | 0   | 0   | 0   | 0     | 0     | 0   |
| Vrij gevestigd psychotherapeut (geen psychiater) | 0                | 0   | 0   | 0   | 0     | 0     | 0   |
| Polikliniek psychiatrie                          | 0                | 0   | 0   | 0   | 0     | 0     | 0   |
| Consultatiebureau voor Alcohol en Drugs (CAD)    | 0                | 0   | 0   | 0   | 0     | 0     | 0   |
| Seksuoloog                                       | 0                | 0   | 0   | 0   | 0     | 0     | 0   |
| Maatschappelijk werker                           | 0                | 0   | 0   | 0   | 0     | 0     | 0   |
| Andere psychosociaal hulpverlener <sup>1</sup>   | 0                | 0   | 0   | 0   | 0     | 0     | 0   |

<sup>1</sup> Indien u contact heeft gehad met een andere psychosociaal hulpverlener, beantwoord dan graag de volgende vraag (75).

75. Wat voor andere **psychosociaal hulpverlener(s)** was(waren) dit? .....

76. Heeft u sinds het begin van uw zwangerschap voor uzelf **contact** gehad met een of meer van volgende **alternatieve behandelaars**? Indien nee, geef dan bij het aantal contacten 0 aan.

| Alternatieve behandelaar                                            | Aantal contacten |     |     |     |       |       |     |
|---------------------------------------------------------------------|------------------|-----|-----|-----|-------|-------|-----|
|                                                                     | 0                | 1-3 | 4-6 | 7-9 | 10-12 | 13-15 | >15 |
| Acupuncturist                                                       | 0                | 0   | 0   | 0   | 0     | 0     | 0   |
| Antroposofisch behandelaar                                          | 0                | 0   | 0   | 0   | 0     | 0     | 0   |
| Homeopaat (niet eigen huisarts)                                     | 0                | 0   | 0   | 0   | 0     | 0     | 0   |
| Manueel behandelaar (chiropractie, osteopathie, manuele therapie)   | 0                | 0   | 0   | 0   | 0     | 0     | 0   |
| Natuurgenezer (voedingstherapie, neuraal therapie, kruidentherapie) | 0                | 0   | 0   | 0   | 0     | 0     | 0   |
| Paranormaal behandelaar (helderziende, gebedsgenezer, magnetiseur)  | 0                | 0   | 0   | 0   | 0     | 0     | 0   |
| Andere alternatief behandelaar <sup>1</sup>                         | 0                | 0   | 0   | 0   | 0     | 0     | 0   |

<sup>1</sup> Indien u contact heeft gehad met een andere alternatief behandelaar, beantwoord dan graag de volgende vraag (77).

77. Wat voor **alternatief behandelaar(s)** was(waren) dit? .....

78. Met welke **andere zorgverleners of instellingen** heeft u **contact** gehad sinds het begin van uw zwangerschap? Indien geen contact, geef dan bij het aantal contacten 0 aan.

| Zorgverlener / Instelling                   | Aantal contacten |     |     |     |       |       |     |
|---------------------------------------------|------------------|-----|-----|-----|-------|-------|-----|
|                                             | 0                | 1-3 | 4-6 | 7-9 | 10-12 | 13-15 | >15 |
| Thuiszorgwinkel                             | 0                | 0   | 0   | 0   | 0     | 0     | 0   |
| Geestelijk verzorger                        | 0                | 0   | 0   | 0   | 0     | 0     | 0   |
| Consultatiebureau                           | 0                | 0   | 0   | 0   | 0     | 0     | 0   |
| Bedrijfsarts                                | 0                | 0   | 0   | 0   | 0     | 0     | 0   |
| Gemeentelijke gezondheidsdienst (GGD)       | 0                | 0   | 0   | 0   | 0     | 0     | 0   |
| Zwangerschaps cursus                        | 0                | 0   | 0   | 0   | 0     | 0     | 0   |
| Andere zorgverlener/instelling <sup>1</sup> | 0                | 0   | 0   | 0   | 0     | 0     | 0   |

<sup>1</sup> Indien u contact heeft gehad met een andere zorgverlener/instelling, beantwoord dan graag de volgende vraag (79).

79. Wat voor **zorgverlener(s)/instelling(en)** was(waren) dit? .....

Indien u of een van uw ouders in het buitenland is geboren, beantwoord dan graag de volgende vraag (80).

80. Heeft u voor deze zwangerschap gebruik gemaakt van de zorg door een verloskundige en/of gynaecoloog in het land waar u of uw ouders geboren zijn?

(meerdere antwoorden mogelijk)

0 ja, voor kindervens

0 ja, voor controles

0 ja, voor .....

0 nee

## GEZONDHEID EN GEZONDHEIDSGEDRAG

De zwangerschap en bevalling hebben waarschijnlijk een behoorlijke invloed op je lichaam gehad. De zorg voor een (extra) kind kan uw gezondheid mogelijk ook beïnvloeden. We stellen nu een aantal vragen over uw gezondheid en hoe u zich voelt (als u al eens eerder voor dit onderzoek benaderd bent kan het voorkomen dat sommige vragen nogmaals worden gesteld omdat uw gevoelens, gezondheid en gedrag kunnen veranderen over de tijd).

81. Hoe zou u, over het algemeen genomen, uw **gezondheid** op dit moment omschrijven?

0 uitstekend

0 zeer goed

0 goed

0 matig

0 slecht

82. Hoe zou u, alles bij elkaar genomen, uw **functioneren** in huis, op het werk en in uw vrije tijd kunnen omschrijven?

0 uitstekend

0 zeer goed

0 goed

0 matig

0 slecht

83. Hoe zou u, over het algemeen genomen, de **gezondheid van uw baby** op dit moment omschrijven?
- uitstekend
  - zeer goed
  - goed
  - matig
  - slecht
84. Hoeveel uur **slaapt u op dit moment** meestal per etmaal?  
..... uur
85. Hoeveel uur **sliep u** meestal per etmaal in de weken **vóór de bevalling**?  
..... uur
86. Kunt u aangeven hoe goed of slecht u sinds de bevalling slaapt?
- heel goed → *ga door naar vraag 88.*
  - goed → *ga door naar vraag 88.*
  - niet goed, niet slecht
  - slecht
  - heel slecht
87. **Waarom** slaapt u niet zo goed? (*meerdere antwoorden mogelijk*)
- ik kan niet makkelijk inslapen
  - ik kan niet makkelijk doorslapen
  - ik wordt vaak wakker van de baby
  - ik moet vaak voeden
  - anders, namelijk .....
88. Geeft u uw baby **borstvoeding**?
- ja, alleen borstvoeding → *ga door naar vraag 90.*
  - ja, gecombineerd met flesvoeding → *ga door naar 90.*
  - nee, eerste dagen/weken wel, maar nu niet meer
  - nee, helemaal niet aan begonnen
89. Wat is de belangrijkste **reden** dat u geen borstvoeding (meer) geeft? (*1 antwoord geven*)
- slechte ervaring met borstvoeding
  - flesvoeding is makkelijker
  - bij flesvoeding kan de partner ook de baby eten geven
  - ik denk dat het slecht is voor (de vorm van) mijn borsten
  - borstvoeding is vermoeiend
  - borstvoeding doet pijn
  - mijn baby dronk niet goed
  - borstvoeding is moeilijk te combineren met mijn werk
  - medische reden
  - anders, namelijk .....
90. Hoe staat het op dit moment met uw **vermoeidheid**?
- Ik ben niet vermoeid
  - Ik ben enigszins vermoeid
  - Ik ben erg vermoeid
91. Hoe staat het op dit moment met uw **mobiliteit**?
- Ik heb geen problemen met lopen
  - Ik heb enige problemen met lopen
  - Ik ben bedlegerig



92. Hoe staat het er op dit moment voor met de **zorg voor uzelf**?  
0 Ik heb geen problemen om mijzelf te wassen of aan te kleden  
0 Ik heb enige problemen om mijzelf te wassen of aan te kleden  
0 Ik ben niet in staat mijzelf te wassen of aan te kleden
93. Hoe staat het er op dit moment voor met uw **dagelijkse activiteiten**?  
0 Ik heb geen problemen met mijn dagelijkse activiteiten  
0 Ik heb enige problemen met mijn dagelijkse activiteiten  
0 Ik ben niet in staat mijn dagelijkse activiteiten uit te voeren
94. En in hoeverre heeft u momenteel **pijn en andere klachten**?  
0 Ik heb geen pijn of andere klachten  
0 Ik heb matige pijn of andere klachten  
0 Ik heb zeer ernstige pijn of andere klachten
95. Hoe staat het er momenteel voor met uw **stemmingen**?  
0 Ik ben niet angstig of somber  
0 Ik ben matig angstig of somber  
0 Ik ben erg angstig of somber
96. Heeft u last van één of meer langdurige **ziekten, aandoeningen of handicaps**?  
0 nee  
0 ja, ik heb last van (*meerdere antwoorden mogelijk*):  
0 allergie  
0 astma  
0 bekkenklachten  
0 rugklachten  
0 whiplash  
0 anders, namelijk .....
97. In de afgelopen vier weken, op gemiddeld hoeveel dagen per week bent u, alles bij elkaar opgeteld, tenminste een half uur bezig geweest met **fietsen, klussen, tuinieren of sporten**?  
..... dagen.
98. Dit moet mijn verloskundige vooral blijven doen:  
.....  
.....
99. Dit zou mijn verloskundige beter anders kunnen doen:  
.....  
.....
100. Wilt u nog opmerkingen of aanvullingen op deze vragenlijst geven, dan kunt u die hier opschrijven.  
.....  
.....  
.....

**HARTELIJK DANK VOOR HET INVULLEN VAN DE VRAGENLIJST**
